# Supplementary material
Source: publisher figshare collection journal article supplement (https://sage.figshare.com/ndownloader/files/14569376)
Supplement: Supplementary file 1 [file 14569376]

## Appendix 1. Study 1 and Study 2 measures

| Measures                      | Item                                                                   | Modalities                                     | Source |
|-------------------------------|------------------------------------------------------------------------|------------------------------------------------|--------|
| Pitch                         | “This voice is...”                                                     | 1 = low-pitched to<br>7 = high-pitched         | 1      |
| Brightness                    | “This voice is...”                                                     | 1 = soft, dull to<br>7 = sharp, bright         |        |
| Roughness                     | “This voice is...”                                                     | 1 = smooth, regular to<br>7 = rough, irregular |        |
| Speaker gender                | “This speaker is a...”                                                 | 1 = man, 2 = woman                             | 2      |
| Voice arousal                 | “This voice is ...”                                                    | 1 = calm to 7 = excited                        |        |
| Voice masculinity             | “This voice is masculine”                                              | 1 = strongly disagree to<br>7 = strongly agree | 3      |
| Speaker warmth                | “This speaker is warm”                                                 |                                                |        |
| Speaker competence            | “This speaker is competent”                                            |                                                |        |
| Attitude toward the speaker   | “I like this speaker”                                                  | 1 = strongly disagree to<br>7 = strongly agree | 4      |
| Attitude toward the candidate | “I like this candidate”                                                |                                                |        |
| Purchase intentions           | “I want to buy this brand”                                             |                                                |        |
| Vote intentions               | “I want to vote for this candidate”                                    |                                                |        |
| Candidate recognition         | “Which presidential candidate is it?”, coded as accurate or inaccurate |                                                |        |

**Legend:** 1 = Huang et al., 2001, Von Bismarck, 1974; 2 = Bänziger, Patel and Scherer, 2014; Laukka, Juslin and Bresin, 2005; 3 = Zuckerman, Hodgins and Miyake, 1993; and 4 = MacKenzie, Lutz and Belch (1986).
